# Supplementary material
Source: MDPI journal article supplement (https://www.mdpi.com/2073-4395/11/10/1943)
Supplement: s1 [file s1]

**Table S1.** List of the chemical markers identified in tomato samples object of this study. For peak diagnostics, see Siracusa et al. [12]. HCQA = HydroxyCinnamoyl Quinic Acids.

| <b>POLYPHENOLS</b> |                                              | <b>abbreviations</b> | <b>biochemical class</b> |
|--------------------|----------------------------------------------|----------------------|--------------------------|
| <b>1</b>           | 5-caffeoylquinic acid (neo-chlorogenic acid) | 5CQA                 | HCQA                     |
| <b>2</b>           | caffeic acid <i>O</i> -hexoside              |                      | HCQA                     |
| <b>3</b>           | 3-caffeoylquinic acid (chlorogenic acid)     | 3CQA                 | HCQA                     |
| <b>4</b>           | feruloylquinic acid – isomer 1               | FQA1                 | HCQA                     |
| <b>5</b>           | feruloylquinic acid – isomer 2               | FQA2                 | HCQA                     |
| <b>6</b>           | rutin <i>O</i> -pentoside                    |                      | flavonoids               |
| <b>7</b>           | rutin (quercetin 3- <i>O</i> -rutinoside)    |                      | flavonoids               |
| <b>8</b>           | <i>p</i> -coumaroylquinic acid – isomer 1    | <i>p</i> CoQA1       | HCQA                     |
| <b>9</b>           | <i>p</i> -coumaroylquinic acid – isomer 2    | <i>p</i> CoQA2       | HCQA                     |
| <b>10</b>          | di-caffeoylquinic acid – isomer 1            | diCQA1               | HCQA                     |
| <b>11</b>          | di-caffeoylquinic acid – isomer 2            | diCQA2               | HCQA                     |
| <b>12</b>          | di-caffeoylquinic acid – isomer 3            | diCQA3               | HCQA                     |
| <b>13</b>          | caffeoyl-feruloylquinic acid – isomer 1      | CFQA1                | HCQA                     |
| <b>14</b>          | caffeoyl-feruloylquinic acid – isomer 2      | CFQA2                | HCQA                     |
| <b>15</b>          | caffeoyl-feruloylquinic acid – isomer 3      | CFQA3                | HCQA                     |
| <b>16</b>          | di-feruloylquinic acid – isomer 1            | diFQA1               | HCQA                     |
| <b>17</b>          | di-feruloylquinic acid – isomer 2            | diFQA2               | HCQA                     |
| <b>18</b>          | quercetin                                    |                      | flavonoids               |
| <b>19</b>          | naringenin                                   |                      | flavonoids               |
|                    |                                              |                      |                          |
| <b>CAROTENOIDS</b> |                                              |                      |                          |
| <b>1</b>           | all - <i>trans</i> -lycopene                 |                      | carotenoids              |
| <b>2</b>           | β-carotene                                   |                      | carotenoids              |
